# Supplementary material for: Association between Education Sunk Cost Fallacy and Anxiety: The Mediating Role of Passive Involution
Source: Research Square preprint supplement (doi:10.21203/rs.3.rs-7397832/v1), 2025-10-08
Supplement: Supplementary file 1 [file 98a627744b54e11ca726604f.docx]

Appendix 1-Educational Sunk Cost Fallacy Scale

1. Although I feel the unsuitable university is not suitable, I would not consider dropping out and retaking the college entrance exam, as doing so would mean all my past efforts were wasted.
2. The current major is not suitable for me, but I would not consider changing majors because doing so would render my past efforts wasted.
3. Even though this competition is not beneficial to my future, I am unwilling to leave empty-handed because I have already invested too much time and effort.
4. I know that pursuing graduate studies isn’t really right for me, but since I’ve been preparing for it for so long, I’m reluctant to give up.
5. Although the elective courses provided by the university are not very effective, since I have already invested a lot of effort, I will still persist in completing them.

Note: This study employed a 5-point Likert scale (1 = Strongly Disagree, 5 = Strongly Agree), with higher scores indicating a stronger tendency toward the educational sunk cost fallacy.
